# Supplementary material for: Hippocampal epileptogenesis in autoimmune encephalitis
Source: PubMed Central journal article supplement (PMC6856617; doi:10.1002/acn3.50919), 2019-10-15
Supplement: ACN3-6-2261-s002.pdf [file ACN3-6-2261-s002.pdf]

**Supplementary material – Table 1.** Patient clinical data.

| ID        | Ab                  | Age | Onset                                                                                              | Time to diagnosis | Cognitive decline | Seizures                                  | Brain MRI                                             | CSF pleocytosis (cells/mm <sup>3</sup> ) | Treatment                                               | mRS at baseline | mRS at 1 year |
|-----------|---------------------|-----|----------------------------------------------------------------------------------------------------|-------------------|-------------------|-------------------------------------------|-------------------------------------------------------|------------------------------------------|---------------------------------------------------------|-----------------|---------------|
| Patient 1 | LGI-1               | 77  | memory impairment, neuro-behavioral disturbances, agrypnia excitata, intestinal pseudo-obstruction | 6 months          | at onset          | yes (admitted for seizure, had also FBDS) | T2-weighted bilateral mesial temporal hyper-intensity | 9                                        | Ivlg + Iv steroid, followed by gradual steroid tapering | 4               | 2             |
| Patient 2 | CASPR2              | 62  | dys-autonomic features, fasciculations memory impairment                                           | 6 months          | at onset          | yes (admitted for telemetry)              | Normal                                                | 15                                       | Ivlg + Iv steroid, followed by gradual steroid tapering | 2               | 0             |
| Patient 3 | GABA <sub>B</sub> R | 56  | isolated memory impairment                                                                         | 3 months          | at onset          | yes (admitted for first seizure)          | Normal                                                | 9                                        | Ivlg + Iv steroid                                       | 2               | 0             |

Legend - Ab: antibody; CSF: cerebrospinal fluid; FBDS: facio-brachial dystonic seizures; Ivlg: intravenous immunoglobulin; mRS: modified Rankin scale.
